WITHDRAWN ARTICLE

**WITHDRAWN: Supplementation with Fe<sup>2+</sup>-containing agents mitigated the toxic effect of CoNPs in vascular endothelial cells by inhibiting activation of hypoxia-inducible factor**

*Wenfeng Zhu, Yake Liu, Wei Wang, Zihua Zhou, Jinghua Gu, Zexu Zhang, Huanjian Sun, Fan Liu*

*Bioscience Reports* (2020) BSR20201260; **DOI:** 10.1042/BSR20201260

The Accepted Manuscript version of this article (published on 3 August 2020) was withdrawn on 28 August 2020. The authors have identified a mistake in their experimental technique at a post-acceptance stage, hence are withdrawing their article due to concerns over data validity.
